# Supplementary material for: Enhancing white light-emitting diode performance with an ultra-wide spectrum ZnS:Mn-CDs@SiO2 dual core@shell composite
Source: Royal Society of Chemistry journal article supplement (doi:10.1039/d4qi01099j), 2024-11-26
Supplement: d4qi01099j1.pdf [file d4qi01099j1.pdf]

## Support Information

# Enhancing White Light-Emitting Diode Performance with Ultra-Wide Spectrum ZnS:Mn-CDs@SiO<sub>2</sub> Dual Core@Shell Composite

Haijiang Qiu<sup>a,b</sup>, Song Yang<sup>a</sup>, Min Li<sup>a</sup>, Haixin Chen<sup>a</sup>, Yongqi Zhang<sup>a</sup>, Xin Chen<sup>\*a</sup>, and Yuanhui Zheng<sup>\*a,b</sup>

a.College of Chemistry, Fuzhou University, Fuzhou 350116, China.

b. Fujian Science & Technology Innovation Laboratory for Optoelectronic Information, 350116, China.

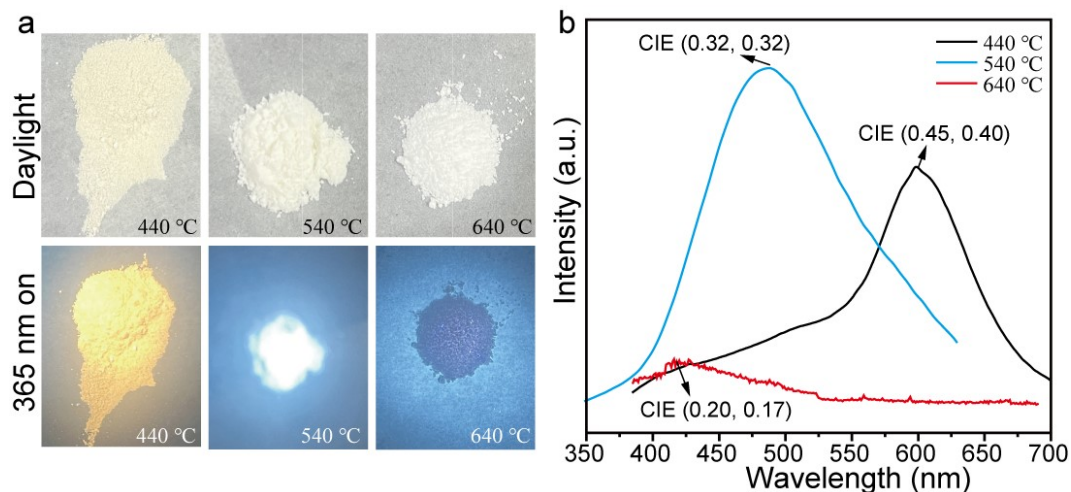

**Fig. S1.** a) Daylight and UV images, and b) Fluorescence spectra of ZnS:Mn-CDs@SiO<sub>2</sub> samples synthesized at 440 °C, 540 °C and 640 °C under excitation at 365 nm

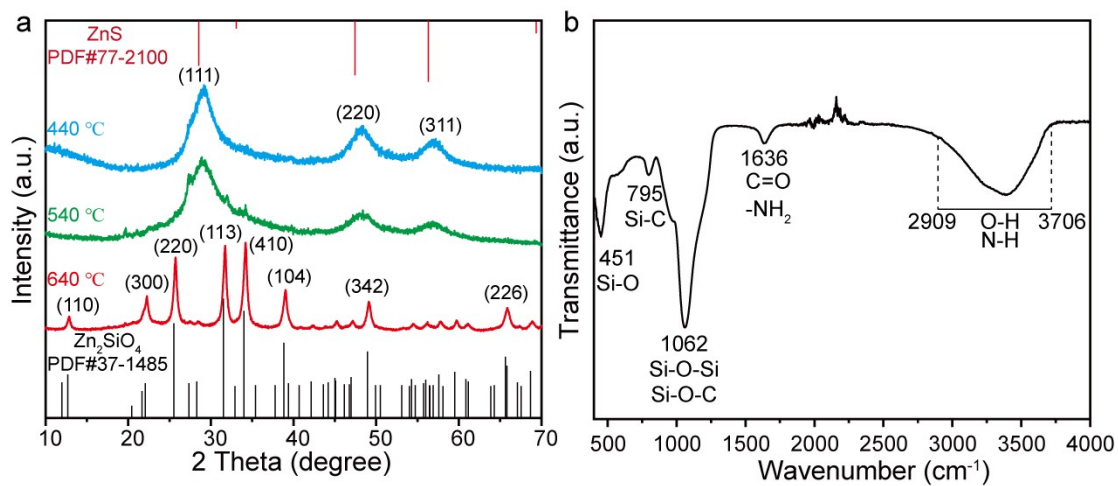

**Fig. S2.** a) Powder XRD patterns of the as-prepared ZnS:Mn-CDs@SiO<sub>2</sub> at 440 °C, 540 °C and 640 °C and standard card reference data of sphalerite ZnS (red line) and ZnSiO<sub>4</sub>, b) Fourier transform infrared spectra of as-synthesized ZnS:Mn-CDs@SiO<sub>2</sub>.

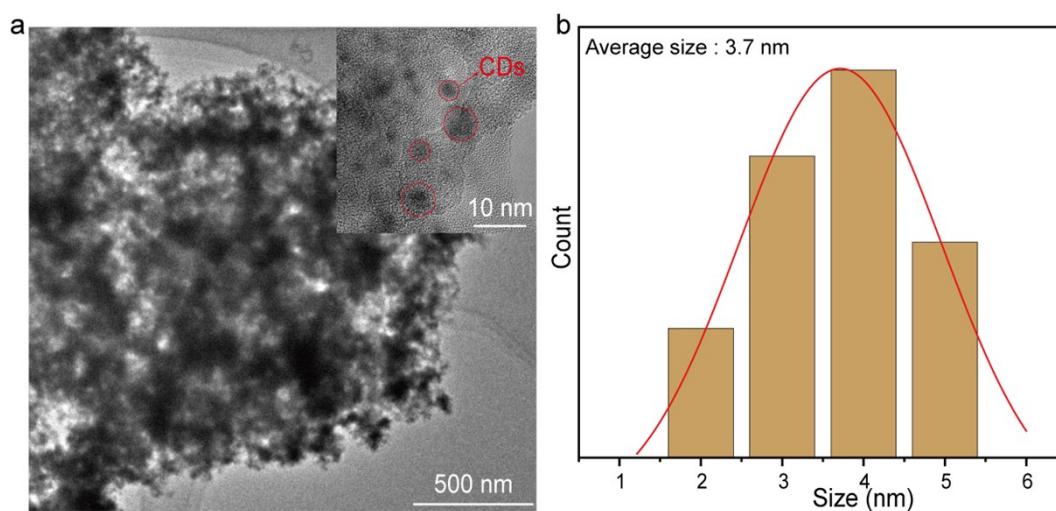

**Fig. S3.** a) TEM images of ZnS:Mn-CDs@SiO<sub>2</sub> treated with HF acid and b) size distribution histograms of CDs.

In order to exclude the ZnS:Mn component in the ZnS:Mn-CDs@SiO<sub>2</sub> composite for microscopic transmission observation of CDs, we etched the composite material with HF acid. In a typical procedure, 0.15 g of ZnS:Mn-CDs@SiO<sub>2</sub> and 1 mL of HF (8 wt%) were mixed and stirred at 1000 rpm for 4 h. The product was obtained by removing the supernatant and drying at 60 °C for 24 hours. Finally, 10 mg of the dried product was redispersed in ethanol for TEM sample preparation.

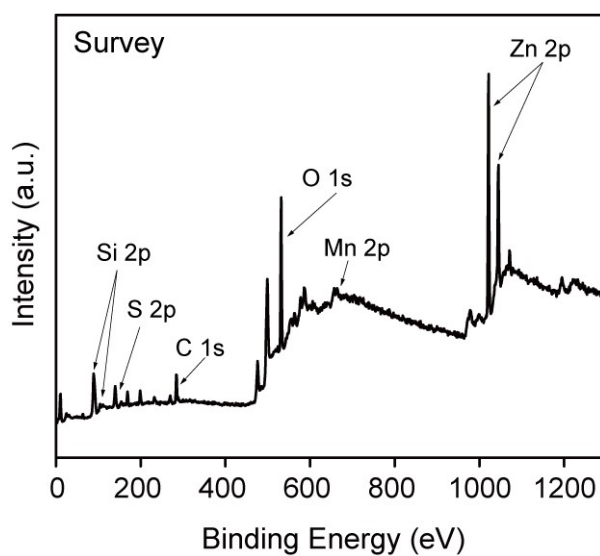

**Fig. S4.** X-ray Photoelectron Spectroscopy (XPS) survey scan of ZnS:Mn-CDs@SiO<sub>2</sub>.

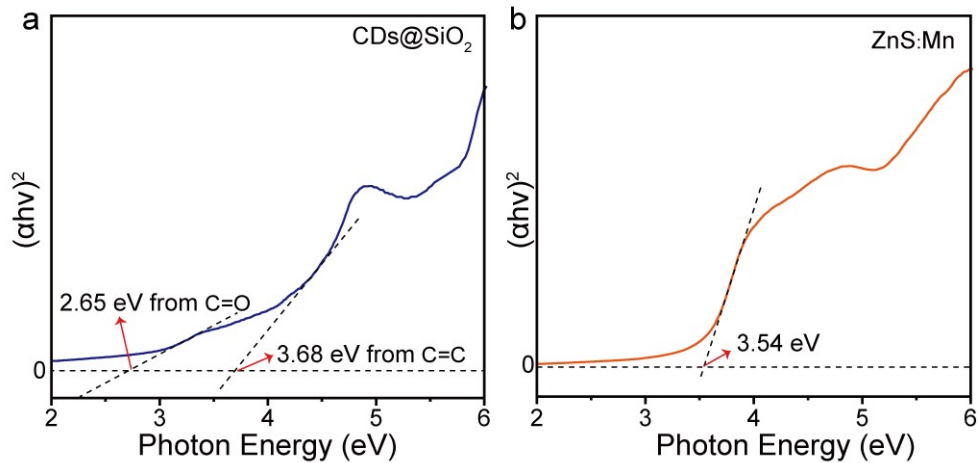

**Fig. S5.** Tauc plot of the as-prepared: a) CDs@SiO<sub>2</sub>, and b) ZnS:Mn nanocrystals.

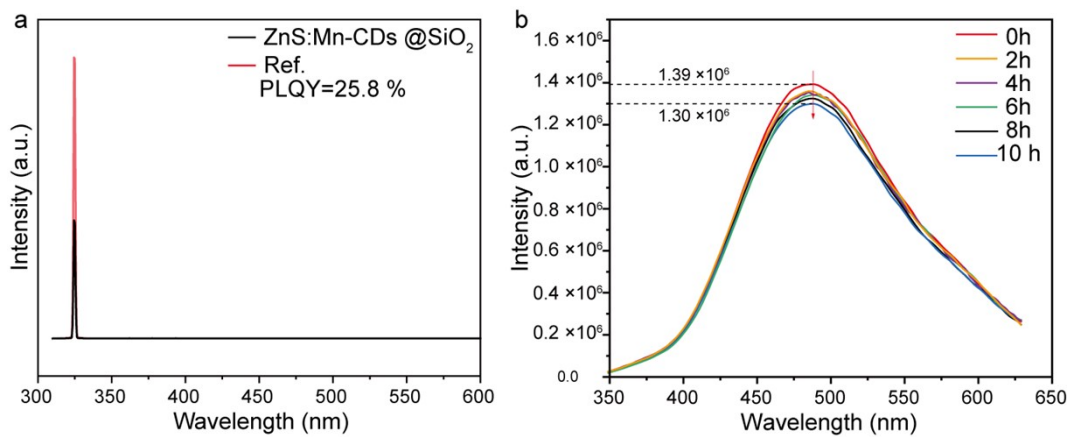

**Fig. S6.** a) Quantitative photoluminescence spectra of ZnS:Mn-CDs@SiO<sub>2</sub> and the reference for absolute photoluminescence quantum yield (PLQY) determination, and b) the fluorescent intensity of ZnS:Mn-CDs@SiO<sub>2</sub> under 365 nm UV irradiation for different times.

**Table S1.** The percentage of atoms of ZnS:Mn-CDs@SiO<sub>2</sub> in the X-ray Photoelectron Spectroscopy spectrum.

| C 1s (Atomic %) | O 1s (Atomic %) | Si 2p (Atomic %) | Mn 2p (Atomic %) | Zn 2p (Atomic %) | S 2p (Atomic %) |
|-----------------|-----------------|------------------|------------------|------------------|-----------------|
| 14.3            | 48.1            | 29.2             | 0.5              | 6.0              | 1.9             |

**Table S2.** Fluorescence lifetime parameters of CDs@SiO<sub>2</sub>, ZnS:Mn, and ZnS:Mn-CDs@SiO<sub>2</sub>, corresponding to Fig. 3d-f.

| Sample                      | Em(nm) | A <sub>1</sub> | τ <sub>1</sub> (ns) | A <sub>2</sub> | τ <sub>2</sub> (ns) | r <sup>2</sup> |
|-----------------------------|--------|----------------|---------------------|----------------|---------------------|----------------|
| CDs@SiO <sub>2</sub>        | 447    | 644.71         | 2.23                | 275.7          | 9.3                 | 1.06           |
| ZnS:Mn                      | 602    | 311.89         | 2.79                | 194.59         | 10.18               | 1.05           |
| ZnS:Mn-CDs@SiO <sub>2</sub> | 447    | 637.34         | 2.25                | 379.41         | 9.92                | 1.04           |
|                             | 602    | 344.93         | 1.54                | 53.93          | 10.37               | 1.08           |

**Table S3.** Electroluminescence characteristics of WLED devices based on ZnS:Mn-CDs@SiO<sub>2</sub> materials measured under varying voltages and currents.

| Voltage (V) | Current (A) | Luminous flux (Lumen) | CCT (K) | Ra   | CRI  | Luminous efficiency (Lm/W) | Power efficiency (Watt(O)/Watt(E) %) |
|-------------|-------------|-----------------------|---------|------|------|----------------------------|--------------------------------------|
| 3.34        | 0.08        | 8.52                  | 5848    | 76.8 | 74.2 | 31.88                      | 40.6                                 |
| 3.39        | 0.12        | 12.95                 | 5856    | 78.3 | 74.3 | 31.83                      | 40.6                                 |
| 3.43        | 0.16        | 17.46                 | 5859    | 79.2 | 74.9 | 31.81                      | 40.6                                 |
| -           | -           | -                     | 5854.3  | 78.1 | 74.5 | 31.84                      | 40.6                                 |

**Table S4.** Performance comparison of our WLED device with other carbon dot WLED devices based on a single matrix

| Reference | CRI  | CCT    | Luminous efficiency (Lm/W) | CIE          | Comprehensive evaluation                                    |
|-----------|------|--------|----------------------------|--------------|-------------------------------------------------------------|
| 1         | 79   | 5240   | 5.9                        | 0.34, 0.37   | Good color reproduction, but low luminous efficiency        |
| 2         | 77   | 5893   | 1.173                      | 0.33, 0.39   | Very low luminous efficiency, limits usability              |
| 3         | 85   | 3032   | 5.65                       | 0.42, 0.38   | High color accuracy, but low CCT and noticeable color shift |
| 4         | 85.3 | 8756   | 18.7                       | 0.268, 0.346 | High color accuracy, but very high CCT with color shift     |
| 5         | 68.4 | 6565   | 32.26                      | 0.32, 0.33   | High luminous efficiency, but low color reproduction        |
| 6         | 71.7 | 7818   | 58.14                      | 0.29, 0.33   | Highest luminous efficiency, but very high CCT              |
| This Work | 74.5 | 5854.3 | 31.84                      | 0.32, 0.38   | Well-balanced, suitable for general lighting                |

## Notes and references

1. Z. Zhou, P. Tian, X. Liu, S. Mei, D. Zhou, D. Li, P. Jing, W. Zhang, R. Guo and S. Qu, Hydrogen peroxide-treated carbon dot phosphor with a bathochromic-shifted, aggregation-enhanced emission for light-emitting devices and visible light communication, *Advanced Science*, 2018, **5**, 1800369.
2. X. Liu, J. Zheng, Y. Yang, Y. Chen, and X. Liu, Preparation of N-doped carbon dots based on starch and their application in white LED, *Optical Materials*, 2018, **86**, 530-536.
3. T. Meng, T. Yuan, X. Li, Y. Li, L. Fan, and S. Yang, Ultrabroad-band, red sufficient, solid white emission from carbon quantum dot aggregation for single component warm white light emitting diodes with a 91 high color rendering index, *Chemical Communications*, 2019, **55**(46), 6531-6534.
4. Z. Wang, Y. Liu, S. Zhen, X. Li, W. Zhang, X. Sun, and X. Meng, Gram-scale synthesis of 41 % efficient single-component white-light-emissive carbonized polymer dots with hybrid fluorescence/phosphorescence for white light-emitting diodes, 2020, *Advanced Science*, 7(4), 1902688.
5. Y. Zhang, R. Yuan, M. He, G. Hu, J. Jiang, T. Xu, and X. Liang, Multicolour nitrogen-doped carbon dots: tunable photoluminescence and sandwich fluorescent glass-based light-emitting diodes, *Nanoscale*, 2017, **9**(45), 17849-17858.
6. L. Ma, W. Xiang, H. Gao, L. Pei, X. Ma, Y. Huang, and X. Liang, Carbon dot-doped sodium borosilicate gel glasses with emission tunability and their application in white light emitting diodes, *Journal of Materials Chemistry C*, 2015, **3**(26), 6764-6770.
